# Supplementary material
Source: PubMed Central journal article supplement (PMC2725239)
Supplement: mmc1.pdf [file mmc1.pdf]

## Supplemental Data

### Identification of an Agrin Mutation that Causes Congenital Myasthenia and Affects Synapse Function

Caroline Huzé, Stéphanie Bauché, Pascale Richard, Frédéric Chevessier, Evelyne Goillot, Karen Gaudon, Asma Ben Ammar, Annie Chaboud, Isabelle Grosjean, Heba-Aude Lecuyer, Véronique Bernard, Andrée Rouche, Nektaria Alexandri, Thierry Kuntzer, Michel Fardeau, Emmanuel Fournier, Andrea Brancaccio, Markus A. Rüegg, Jeanine Koenig, Bruno Eymard, Laurent Schaeffer, and Daniel Hantai

Figure S1. Fragmentation of the NMJs

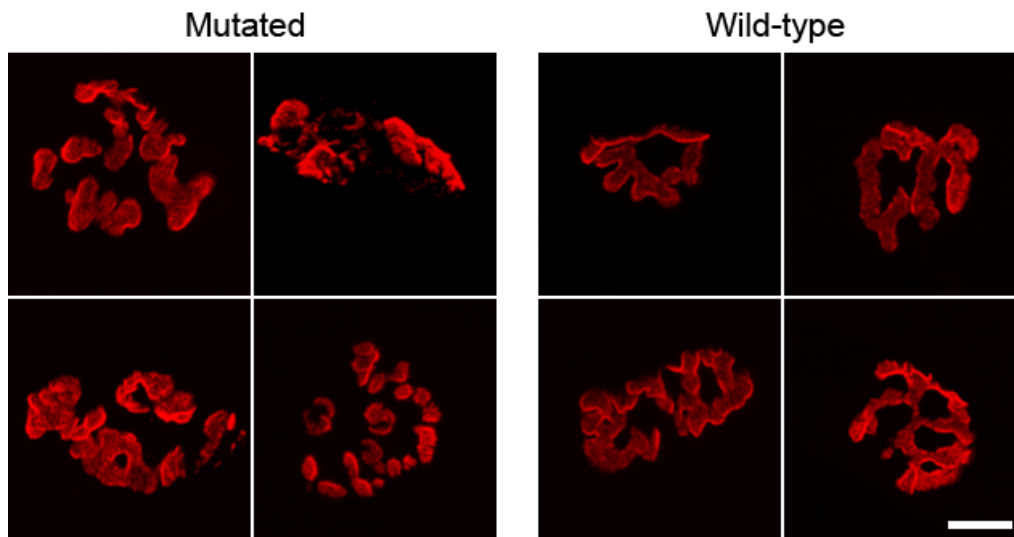

Fragmentation was determined using “en face” NMJs stained with  $\alpha$ -bungarotoxin. The number of fragments which forms one given NMJ was counted and the mean value obtained in each experimental condition (after wild-type or mutated agrin injection) was calculated. The same measurements were made for the human muscle biopsies. Calibration bar represents 10  $\mu$ m and applies to the eight prints.

**Figure S2. MuSK localization on aneural clusters**

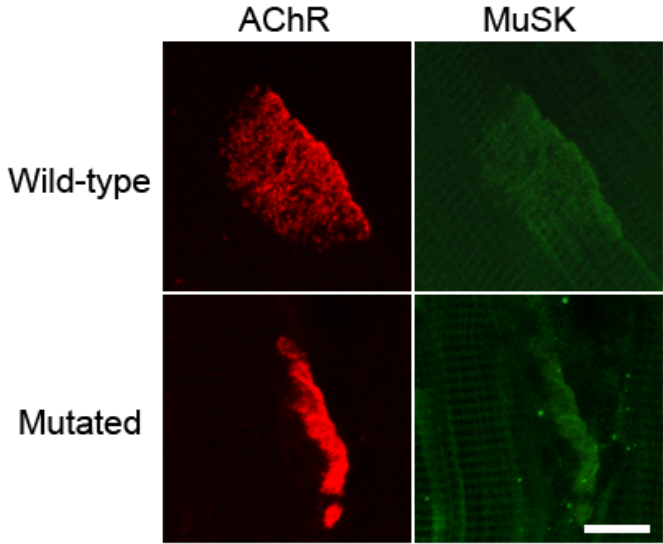

Colocalization of MuSK (green) with the AChR (red) can be observed. Calibration bar represents 4  $\mu\text{m}$  and applies to the four prints.

**Table S1. List of primers for amplification**

| <b>Fragments</b>             | <b>Primers (5' → 3')</b>                       |
|------------------------------|------------------------------------------------|
| Agrin-1F<br>Agrin-1R         | CGTCCCCTCTGTCCAGTCC<br>AGCGACCGGGGCTGGTTC      |
| Agrin-2F<br>Agrin-2R         | CCTTCCCAGGAGAGGACTA<br>GACCCCTGCAACCTGTCC      |
| Agrin-1SNF<br>Agrin-1SNR     | TTCTTCTCGCTCCCGACG<br>GGCTCCAGCCTCTATGTG       |
| Agrin-3F<br>Agrin-3R         | GCCTGCTCAGAGGAGCCTA<br>CCAGACACACTCCACACGTC    |
| Agrin-4F<br>Agrin-4R         | CTGAGCTTTCTCCCCTACCC<br>AGCCTCGTCCATCTCATAG    |
| Agrin-5+6F<br>Agrin-5+6R     | CCCGTCTGACCGGCAAAG<br>CACCTCGACCTGGCACTG       |
| Agrin-7F<br>Agrin-7R         | AGGGTGTCCAGCCTCTC<br>AGATGGCATGTGATGTCCAG      |
| Agrin-8F<br>Agrin-8R         | TCTCTTCTCTCCACCATCC<br>GCGACCAGGAACCTCTCT      |
| Agrin-9F<br>Agrin-9R         | GGGAGAGAGAGGTTCTGGT<br>CTGAGGGAGGCACAGGAC      |
| Agrin-10F<br>Agrin-10R       | GTCCTGTGCCTCCCTCAG<br>CCAGAGCCCAGCAGTTTTTC     |
| Agrin-11+12F<br>Agrin-11+12R | GCTCTGGCTTTGGACAAGAA<br>CACAAATACACACGTCCACAGG |
| Agrin-13+14F<br>Agrin-13+14R | GTCCAGCACTGCATGAAATC<br>GTGATGGGGGTGAACAGGTA   |
| Agrin-15F<br>Agrin-15R       | ACCAGGCTCTGGAGGAGGT<br>CTCTGTGGCTCGGGTGAC      |
| Agrin-16+17F<br>Agrin-16+17R | GTCACCCGAGCCACAGAG<br>AGGCCTTCTGGTCACTTCT      |
| Agrin-18F<br>Agrin-18R       | CTGACGCTGCCCTAAATCC<br>CTCTGGTGGAGCCTCTCG      |
| Agrin-19F<br>Agrin-19R       | CGAGAGGCTCCACCAGAG<br>CCAGGCTATCCTCACACTCC     |
| Agrin-20+21F<br>Agrin-20+21R | CTGGATGCCAGGCAGATG<br>GAGGGAGCTCTGAGCATGG      |

| <b>Fragments</b>             | <b>Primers (5' → 3')</b>                      |
|------------------------------|-----------------------------------------------|
| Agrin-22F<br>Agrin-22R       | CTTCCTGGGAGGCAATGG<br>AGAGGAGGGGGCAGGTAAG     |
| Agrin-23F<br>Agrin-23R       | CCCTGCTCCCAGGAAACC<br>CCAACCTCAAAGCCTGATGGT   |
| Agrin-24F<br>Agrin-24R       | ATCCTCGGAGCTTTTCCAG<br>AGGTGCTCAGGACCATCG     |
| Agrin-25F<br>Agrin-25R       | CGATGGTCCCTGAGCACCTG<br>GCAAAGCCACCTCGTACAC   |
| Agrin-26F<br>Agrin-26R       | GAGGTGGCTTTGCCTGTG<br>GGTCTGGATGGAGGAAGAC     |
| Agrin-27F<br>Agrin-27R       | CTGTGGGCGGTACCCAAC<br>ACTGAGCCGCATCTTAAGT     |
| Agrin-28F<br>Agrin-28R       | TGGGTTTTGAGTTAGGATCCAC<br>CCACAGGAGAGACGGAGGT |
| Agrin-29F<br>Agrin-29R       | CCACCTCCGTCTCTCTGT<br>GTGGGCTCTGTCCACCAC      |
| Agrin-30F<br>Agrin-30R       | CACCAGCAGGTCCCTCAG<br>GAGGAAGAGCAGGCAGCA      |
| Agrin-YF<br>Agrin-YR         | CGCTCACGGAGCTGTTTTTC<br>ACCCGCCATTGCCTATCTA   |
| Agrin-31+32F<br>Agrin-31+32R | GCTCTGCACAGCCACTTACC<br>GTGAGGGTGGGGCCTCGT    |
| Agrin-33F<br>Agrin-33R       | GGATTCTCAGGACCGCACT<br>CGAGGGCACAGATGGAAC     |
| Agrin-Z1F<br>Agrin-Z1R       | TTCCATCTGTGCCCTCGG<br>GGATGGAGGAGTGGGAGTGA    |
| Agrin-Z2F<br>Agrin-Z2R       | TGTTGAGATGGGTTTGCATTGG<br>CCGACAGTGGGAGGGAGAA |
| Agrin-34F<br>Agrin-34R       | GTCCTGTTGCCACCTTCTTA<br>TCACAAGTGACTGGACACAGC |
| Agrin-35F<br>Agrin-35R       | AGAGGAGGCAGAGGGAACCT<br>TGGAGTCTGTCCCTCGGATA  |
| Agrin-36F<br>Agrin-36R       | GCCCCGTCAGTTCCTCAGTGC<br>AGCAGTCCCTCCGGCCAACA |

Grey background: fragments to be amplified with CG rich mix  
Blue background: neural Y and Z specific fragments

**Table S2. *AGRN* polymorphisms**

| Missense polymorphisms | Mutated allele frequency | Indicated when already known |
|------------------------|--------------------------|------------------------------|
| p.Val23Leu             | 0.016                    |                              |
| p.Asp58Asn             | 0.01                     |                              |
| p.Asp105Ile            | 0.01                     |                              |
| p.Thr267Met            | 0.02                     |                              |
| p.Ala375Ser            | 0.01                     |                              |
| p.Glu728Val            | 0.021                    |                              |
| p.Gln852Arg            | 0.005                    | rs9697293                    |
| p.Val984Met            | 0.01                     |                              |
| p.Leu1088Phe           | 0.01                     |                              |
| p.Thr1118Lys           | 0.01                     |                              |
| p.Gln1135Arg           | 0.016                    |                              |
| p.Pro1240Leu           | 0.01                     |                              |
| p.Gly1341Arg           | 0.01                     |                              |
| p.Pro1451Leu           | 0.01                     |                              |
| p.Ala1513Thr           | 0.016                    |                              |
| p.Gln1565His           | 0.01                     |                              |
| p.Val1666Ile           | 0.02                     | rs17160775                   |
| p.Arg1671Gln           | 0.01                     |                              |
| p.Arg1698Pro           | 0.01                     |                              |
| p.Gly1709Arg           | 0.02                     |                              |
| p.Arg1734His           | 0.01                     |                              |
| p.Asp1785Asn           | 0.01                     |                              |
| p.Gly2023Val           | 0.01                     |                              |

*AGRN* missense polymorphisms only are presented in this Table. Intronic polymorphisms as well as synonymous polymorphisms are not. They can be obtained on demand.
